# Supplementary material for: HIV, multimorbidity, and health-related quality of life in rural KwaZulu-Natal, South Africa: A population-based study
Source: PubMed Central journal article supplement (PMC10880982; doi:10.1371/journal.pone.0293963), 2024-02-21
Supplement: pone.0293963.s001.pdf [file pone.0293963.s001.pdf]

Supporting information – Author contributions  
HIV, multimorbidity, and health-related quality of life in rural KwaZulu-Natal, South Africa:  
A population-based study

**Vukuzazi Team** - Below is a list of staff that significantly contributed to the implementation and conduct of Vukuzazi.

| <b>Name</b>              | <b>Role</b>                           |
|--------------------------|---------------------------------------|
| Deenan Pillay            | Principal Investigator (2017-2019)    |
| Willem Hanekom           | Principal Investigator (2019-present) |
| Emily Wong               | Co-Principal Investigator             |
| Mark Siedner             | Co-Principal Investigator             |
| Olivier Koole            | Co-Principal Investigator (2017-2019) |
| Thumbi Ndung'u           | Co-investigator                       |
| Thandeka Khoza           | Co-investigator (2019-present)        |
| Kobus Herbst             | Co-investigator                       |
| Kathy Baisley            | Co-investigator                       |
| Janet Seeley             | Co-investigator                       |
| Alison Grant             | Co-investigator                       |
| Resign Gunda             | Programme Manager                     |
| Ashmika Surujdeen        | Study Coordinator                     |
| Theresa Smit             | Head: Diagnostic Research             |
| Dickman Gareta           | Head: Research Data Management        |
| Day Munatsi              | Head: Research Data Systems           |
| Ngcebo Mhlongo           | Study Physician                       |
| Tshwaraganang Modise     | Research Data Manager                 |
| Jaco Dreyer              | Senior Research Data Manager          |
| Siyabonga Nxumalo        | Research Data Manager                 |
| Stephen Olivier          | Statistician                          |
| Gregory Ording-Jespersen | Laboratory Data Supervisor            |
| Innocentia Mpfana        | Diagnostic Laboratory Manager         |
| Khadija Khan             | Biorepository Manager                 |
| Zizile Sikhosana         | Somkhele Laboratory Supervisor        |
| Sashen Moodley           | Microbiology Laboratory Supervisor    |
| Hollis Shen              | Head: Exploratory Research Division   |
| Philippa Mathews         | Clinical Governance                   |
| Nompilo Buthelezi        | Training Coordinator                  |
| Hlolisile Khumalo        | Nursing Manager                       |
| Sanah Bucibo             | Professional Nurse                    |
| Nozipho Mbonambi         | Professional Nurse                    |
| Hloniphile Ngubane       | Professional Nurse                    |
| Thokozani Simelane       | Professional Nurse                    |
| Khanyisani Buthelezi     | Professional Nurse                    |
| Sphiwe Ntuli             | Professional Nurse                    |
| Nombuyiselo Zondi        | Professional Nurse                    |

Supporting information – Author contributions  
HIV, multimorbidity, and health-related quality of life in rural KwaZulu-Natal, South Africa:  
A population-based study

|                            |                                        |
|----------------------------|----------------------------------------|
| Siboniso Nene              | Professional Nurse                     |
| Bongumenzi Ndlovu          | Enrolled Nurse                         |
| Talente Ntimbane           | Enrolled Nurse                         |
| Mbali Mbuyisa              | Enrolled Nurse                         |
| Xolani Mkhize              | Enrolled Nurse                         |
| Melusi Sibiya              | Enrolled Nurse                         |
| Ntombiyenkosi Ntombela     | Enrolled Nurse                         |
| Mandisi Dlamini            | Enrolled Nurse                         |
| Hlobisile Chonco           | Enrolled Nurse                         |
| Hlengiwe Dlamini           | Enrolled Nurse                         |
| Doctar Mlambo              | Enrolled Nurse                         |
| Nonhlanhla Mzimela         | Enrolled Nurse                         |
| Zinhle Buthelezi           | Enrolled Nurse                         |
| Zinhle Mthembu             | Enrolled Nurse                         |
| Thokozani Bhengu           | Enrolled Nurse                         |
| Sandile Mthembu            | Enrolled Nurse                         |
| Phumelele Mthethwa         | Enrolled Nurse                         |
| Zamashandu Mbatha          | Enrolled Nurse                         |
| Welcome Petros Mthembu     | Enrolled Nurse                         |
| Anele Mkhwanazi            | Clinical Research Assistant Supervisor |
| Mandlakayise Zikhali       | Clinical Research Assistant Supervisor |
| Phakamani Mkhwanazi        | Clinical Research Assistant            |
| Ntombiyenhlanhla Mkhwanazi | Clinical Research Assistant            |
| Rose Myeni                 | Clinical Research Assistant            |
| Fezeka Mfeka               | Clinical Research Assistant            |
| Hlobisile Gumede           | Clinical Research Assistant            |
| Nonceba Mfeka              | Clinical Research Assistant            |
| Ayanda Zungu               | Clinical Research Assistant            |
| Nonhlanhla Mfekayi         | Clinical Research Assistant            |
| Smangaliso Zulu            | Clinical Research Assistant            |
| Mzamo Buthelezi            | Clinical Research Assistant            |
| Senzeni Mkhwanazi          | Clinical Research Assistant            |
| Mlungisi Dube              | Clinical Research Assistant            |
| Hosea Kambonde             | IT Systems Developer                   |
| Lindani Mthembu            | Information Technology Assistant       |
| Seneme Mchunu              | Information Technology Assistant       |
| Sibahle Gumbi              | Research Admin Assistant               |
| Tumi Madolo                | Research Data Manager                  |
| Thengokwakhe Nkosi         | Driver                                 |
| Sibusiso Mkhwanazi         | Driver                                 |
| Sibusiso Nsibande          | Driver                                 |
| Mpumelelo Steto            | Driver                                 |
| Sibusiso Mhlongo           | Driver                                 |
| Velile Vellem              | Driver                                 |
| Pfarelo Tshivase           | Driver                                 |
| Jabu Kwinda                | Driver                                 |

Supporting information – Author contributions  
HIV, multimorbidity, and health-related quality of life in rural KwaZulu-Natal, South Africa:  
A population-based study

|                        |                                               |
|------------------------|-----------------------------------------------|
| Bongani Magwaza        | General Worker                                |
| Siyabonga Nsibandé     | General Worker                                |
| Skhumbuzo Mthombeni    | General Worker                                |
| Sphiwe Clement Mthembu | General Worker                                |
| Antony Rapulana        | Laboratory Technologist                       |
| Jade Cousins           | Laboratory Technologist                       |
| Thabile Zondi          | Laboratory Technologist                       |
| Nagavelli Padayachi    | Laboratory Technologist                       |
| Freddy Mabetlela       | Laboratory Technologist                       |
| Simphiwe Ntshangase    | Laboratory Technician/LIMS Administrator      |
| Nomfundo Luthuli       | Laboratory Technician                         |
| Sithembile Ngcobo      | Laboratory Technologist                       |
| Kayleen Brien          | Laboratory Technologist                       |
| Sizwe Ndlela           | Laboratory Technician                         |
| Nomfundo Ngema         | Laboratory Technician                         |
| Nokukhanya Ntshakala   | Laboratory Technician                         |
| Anupa Singh            | Laboratory Technician                         |
| Rochelle Singh         | Laboratory Technician                         |
| Logan Pillay           | Laboratory Technician                         |
| Kandaseelan Chetty     | Laboratory Technician                         |
| Ashentha Govender      | Laboratory Technician                         |
| Pamela Ramkalawon      | Laboratory Research Technician                |
| Nondumiso Mabaso       | Laboratory Intern                             |
| Kimeshree Perumal      | Laboratory Intern                             |
| Senamile Makhari       | Biorepository Laboratory Technician           |
| Nondumiso Khuluse      | Biorepository Laboratory Technician           |
| Nondumiso Zitha        | Biorepository Research Assistant              |
| Hlengiwe Khathi        | Biorepository Research Assistant              |
| Mbuti Mofokeng         | Clinical Specimen Driver/Laboratory Assistant |
| Nomathamsanqa Majazi   | Public Engagement                             |
| Nceba Gqaleni          | Public Engagement                             |
| Hannah Keal            | Communications                                |
| Phumla Ngcobo          | Communications                                |
| Costa Criticos         | Operational Oversight                         |
| Raynold Zondo          | Operational Oversight                         |
| Dilip Kalyan           | Operational Oversight                         |
| Clive Mavimbela        | Operational Oversight                         |
| Anand Ramnanan         | Procurement                                   |
| Sashin Harilall        | Grants Office                                 |
| Kennedy Nyamande       | Pulmonology Consultant                        |
| Jaikrishna Kalideen    | Radiologist                                   |
| Ramesh Jackpersad      | Radiologist                                   |
| Kgaugelo Moropane      | Radiographer                                  |
| Boitsholo Mfolo        | Radiographer                                  |
| Khabonina Malomane     | Radiographer                                  |
